# Supplementary material for: Mitochondrial Complex Abundance, Mitophagy Proteins, and Physical Performance in People With and Without Peripheral Artery Disease
Source: PubMed Central journal article supplement — J Am Heart Assoc. 2023 Mar 9;12(6):e027088. doi: 10.1161/JAHA.122.027088 (PMC10111535; doi:10.1161/jaha.122.027088), 2023-03-09
Supplement: JAH3-12-e027088-s001.pdf [file JAH3-12-e027088-s001.pdf]

## **SUPPLEMENTAL MATERIAL**

## Data S1. Supplemental Methods

### Preparation of muscle tissue extracts and immunodetection of selected markers of mitochondrial quality control

Whole-tissue extracts were prepared from snap-frozen gastrocnemius muscle samples using an extraction buffer (20 mM HEPES, pH 7.4, 2 mM EGTA, 1% Triton X-100, 2% glycerol, 50 mM  $\beta$ -glycerophosphate, 1 $\times$  Halt-protease, and phosphatase inhibitor cocktail). Briefly, 20-30 mg of muscle tissue were immersed in a pre-cooled vial containing zirconium beads ( $\varnothing$  3 mm) and extraction buffer (1:20 w/v), placed in a BeadBug homogenizer (Benchmark Scientific, Sayreville, NJ), and homogenized 5 times at setting 4,000 for 30 s each, with intermittent 1-min cooling on ice. Afterwards, the cleared homogenate was sonicated 10 times for  $\sim$ 3 s each, followed by centrifugation at 10,000  $\times$ g for 10 min at 4  $^{\circ}$ C. The resulting supernatant was collected and total protein content was determined via the Bradford colorimetric assay. Samples were subsequently diluted in Laemmli sample buffer (Bio-Rad, Hercules, CA) supplemented with  $\beta$ -mercaptoethanol (Bio-Rad) for Western blot, or sample buffer and Fluorescent Master Mix (both from ProteinSimple, San Jose, CA) for the Jess system (ProteinSimple), and proteins were denatured at 95  $^{\circ}$ C for 5 min. For Western blot immunodetection, 50  $\mu$ g of protein were loaded onto a 4–20% Criterion TGX Precast Midi Protein Gel (Bio-Rad), and separated in a Bio-Rad running buffer. Separated proteins were transferred onto a polyvinylidene fluoride or a nitrocellulose membrane (0.2  $\mu$ m; Bio-Rad) using a Bio-Rad Trans-Blot Turbo Transfer System and Transfer buffer. The membranes were reversibly stained with Ponceau S (MilliporeSigma, Burlington, MA), imaged with a Bio-Rad ChemiDoc XRS+ imager to visualize total protein, and subsequently blocked for 60 min at room temperature with 5% Blocking-grade Blocker (Bio-Rad) or 5% bovine serum albumin (MilliporeSigma) in Tris-buffered saline (Bio-Rad) with 0.05% tween-

20 (Bio-Rad). Sample protein concentrations of 0.25 and 0.75  $\mu\text{g}/\mu\text{L}$  were loaded on the Jess separation module (12 to 230 kDa; ProteinSimple). The following commercially available primary antibodies and dilutions were used: microtubule-associated protein 1A/1B-light chain 3 (LC3A/B, Cell Signaling, Danvers, MA, #4108; 1:500), p62 (MilliporeSigma, #P0067; 1:600), phosphatase and tensin homolog-induced kinase 1 (PINK1, Novus Biologicals, Centennial, CO, #NB100-644SS; 1:50), Parkin (Abcam, Cambridge, MA, #ab77924; 1:100), nuclear respiratory factor 1 (NRF1, Santa Cruz Biotechnologies, Dallas, TX, #sc-101102; 1:50), PGC-1 $\alpha$  (MilliporeSigma, #516557; 1:25), mitochondrial transcription factor A (TFAM, Novus Biologicals #NBP1-71648SS; 1:400), and ETC complexes I to V (Total OXPHOS antibody cocktail, Abcam #ab110411; 1:500). Secondary antibodies applied in the Jess system were horseradish peroxidase (HRP)-conjugated anti-mouse or anti-rabbit IgG from ProteinSimple. HRP-conjugated secondary antibodies for traditional Western Blot immunodetection were purchased from Cell Signaling (anti-rabbit IgG #7074, 1:5,000; anti-mouse IgG #7076, 1:5,000). All other reagents and supplies used for the automated procedures on the Jess system were purchased from ProteinSimple or from Bio-Rad for traditional Western blots. The optimal dilution of each antibody was determined against a calibration curve of serial homogenate dilutions to ensure linearity of signal quantification. The quantification of electropherograms for the Jess system was accomplished with Compass for SW software (v4.1.0; ProteinSimple) using a Gaussian peak fit or dropped lines distribution for area under the curve. The peak area for each capillary was normalized to total protein using the system's Protein Normalization capability and reagents for the Jess system. For Western blot, protein content was quantified using the Image Lab 6.0 software (Bio-Rad) based on the spot density of target bands acquired with a ChemiDoc XRS+ imager (Bio-Rad). The spot density of target bands was normalized to the amount of protein loaded in each lane as determined by densitometric analysis of the corresponding Ponceau S-stained

membranes.<sup>39,40</sup>

**Table S1. Correlation analysis between markers of mitochondrial quality control in gastrocnemius muscle samples and measures of physical performance in participants with and without peripheral artery disease according to disease severity**

|                      | Moderate to severe PAD (ABI <0.60) |                           |                           |                           | Mild PAD (ABI 0.60–0.90)  |                           |                           |                            | No PAD                    |                           |                           |                           |
|----------------------|------------------------------------|---------------------------|---------------------------|---------------------------|---------------------------|---------------------------|---------------------------|----------------------------|---------------------------|---------------------------|---------------------------|---------------------------|
|                      | 6MWT<br>(n=15)                     | 4MGS<br>usual<br>(n=15)   | 4MGS<br>fast<br>(n=15)    | SPPB<br>score<br>(n=15)   | 6MWT<br>(n=29)            | 4MGS<br>usual<br>(n=28)   | 4MGS<br>fast<br>(n=28)    | SPPB<br>score<br>(n=28)    | 6MWT<br>(n=23)            | 4MGS<br>usual<br>(n=23)   | 4MGS<br>fast<br>(n=23)    | SPPB<br>score<br>(n=22)   |
| <b>LC3A/B I</b>      | 0.188<br><i>P</i> =0.502           | -0.057<br><i>P</i> =0.841 | -0.056<br><i>P</i> =0.843 | -0.076<br><i>P</i> =0.787 | -0.086<br><i>P</i> =0.659 | 0.293<br><i>P</i> =0.130  | 0.190<br><i>P</i> =0.333  | 0.156<br><i>P</i> =0.427   | -0.686<br><i>P</i> <0.001 | -0.675<br><i>P</i> <0.001 | -0.575<br><i>P</i> =0.004 | -0.568<br><i>P</i> =0.006 |
| <b>LC3A/B II</b>     | 0.402<br><i>P</i> =0.138           | 0.272<br><i>P</i> =0.326  | 0.172<br><i>P</i> =0.539  | 0.081<br><i>P</i> =0.773  | 0.024<br><i>P</i> =0.902  | 0.278<br><i>P</i> =0.153  | 0.147<br><i>P</i> =0.456  | 0.252<br><i>P</i> =0.196   | -0.438<br><i>P</i> =0.037 | -0.484<br><i>P</i> =0.019 | -0.340<br><i>P</i> =0.112 | -0.309<br><i>P</i> =0.161 |
| <b>LC3 II/LC3 I</b>  | 0.325<br><i>P</i> =0.238           | 0.354<br><i>P</i> =0.195  | 0.239<br><i>P</i> =0.391  | 0.114<br><i>P</i> =0.687  | 0.151<br><i>P</i> =0.434  | 0.159<br><i>P</i> =0.418  | 0.0045<br><i>P</i> =0.982 | 0.214<br><i>P</i> =0.275   | 0.286<br><i>P</i> =0.187  | 0.179<br><i>P</i> =0.415  | 0.268<br><i>P</i> =0.216  | 0.289<br><i>P</i> =0.192  |
| <b>p62</b>           | -0.133<br><i>P</i> =0.637          | -0.092<br><i>P</i> =0.745 | 0.017<br><i>P</i> =0.953  | -0.018<br><i>P</i> =0.949 | -0.179<br><i>P</i> =0.352 | -0.235<br><i>P</i> =0.229 | -0.218<br><i>P</i> =0.265 | -0.058<br><i>P</i> =0.769  | -0.254<br><i>P</i> =0.242 | -0.297<br><i>P</i> =0.168 | -0.270<br><i>P</i> =0.214 | -0.108<br><i>P</i> =0.631 |
| <b>PINK1</b>         | 0.131<br><i>P</i> =0.643           | 0.133<br><i>P</i> =0.637  | -0.017<br><i>P</i> =0.953 | -0.050<br><i>P</i> =0.860 | -0.199<br><i>P</i> =0.300 | 0.196<br><i>P</i> =0.316  | 0.035<br><i>P</i> =0.860  | 0.103<br><i>P</i> =0.602   | -0.277<br><i>P</i> =0.200 | -0.410<br><i>P</i> =0.052 | -0.284<br><i>P</i> =0.190 | -0.156<br><i>P</i> =0.487 |
| <b>PINK1-cleaved</b> | 0.118<br><i>P</i> =0.675           | -0.123<br><i>P</i> =0.662 | -0.235<br><i>P</i> =0.400 | -0.150<br><i>P</i> =0.594 | -0.089<br><i>P</i> =0.647 | -0.138<br><i>P</i> =0.485 | -0.177<br><i>P</i> =0.369 | -0.0045<br><i>P</i> =0.982 | 0.377<br><i>P</i> =0.076  | 0.321<br><i>P</i> =0.135  | 0.419<br><i>P</i> =0.047  | 0.344<br><i>P</i> =0.116  |

|                                 |                           |                           |                           |                           |                           |                           |                           |                           |                           |                           |                           |                           |
|---------------------------------|---------------------------|---------------------------|---------------------------|---------------------------|---------------------------|---------------------------|---------------------------|---------------------------|---------------------------|---------------------------|---------------------------|---------------------------|
| <b>Parkin</b>                   | -0.320<br><i>P</i> =0.245 | -0.485<br><i>P</i> =0.067 | -0.574<br><i>P</i> =0.025 | -0.474<br><i>P</i> =0.074 | 0.023<br><i>P</i> =0.906  | -0.160<br><i>P</i> =0.415 | -0.138<br><i>P</i> =0.482 | 0.048<br><i>P</i> =0.808  | 0.049<br><i>P</i> =0.826  | -0.121<br><i>P</i> =0.581 | -0.027<br><i>P</i> =0.903 | 0.001<br><i>P</i> =0.998  |
| <b>NRF1</b>                     | -0.113<br><i>P</i> =0.689 | 0.092<br><i>P</i> =0.746  | 0.024<br><i>P</i> =0.932  | -0.182<br><i>P</i> =0.516 | -0.227<br><i>P</i> =0.236 | 0.143<br><i>P</i> =0.469  | 0.066<br><i>P</i> =0.738  | 0.118<br><i>P</i> =0.551  | -0.351<br><i>P</i> =0.101 | -0.525<br><i>P</i> =0.010 | -0.387<br><i>P</i> =0.068 | -0.235<br><i>P</i> =0.293 |
| <b>PGC-1<math>\alpha</math></b> | -0.219<br><i>P</i> =0.432 | -0.646<br><i>P</i> =0.009 | -0.553<br><i>P</i> =0.033 | -0.309<br><i>P</i> =0.262 | -0.254<br><i>P</i> =0.184 | -0.045<br><i>P</i> =0.818 | -0.034<br><i>P</i> =0.866 | 0.026<br><i>P</i> =0.895  | -0.323<br><i>P</i> =0.133 | -0.451<br><i>P</i> =0.031 | -0.318<br><i>P</i> =0.139 | -0.277<br><i>P</i> =0.211 |
| <b>TFAM</b>                     | 0.169<br><i>P</i> =0.548  | -0.257<br><i>P</i> =0.355 | -0.326<br><i>P</i> =0.236 | -0.232<br><i>P</i> =0.406 | -0.245<br><i>P</i> =0.201 | -0.167<br><i>P</i> =0.397 | -0.250<br><i>P</i> =0.200 | -0.102<br><i>P</i> =0.604 | 0.264<br><i>P</i> =0.223  | 0.175<br><i>P</i> =0.425  | 0.272<br><i>P</i> =0.209  | 0.178<br><i>P</i> =0.429  |
| <b>Complex I</b>                | 0.032<br><i>P</i> =0.911  | 0.161<br><i>P</i> =0.566  | 0.371<br><i>P</i> =0.173  | 0.331<br><i>P</i> =0.228  | 0.131<br><i>P</i> =0.499  | 0.258<br><i>P</i> =0.184  | 0.079<br><i>P</i> =0.688  | 0.142<br><i>P</i> =0.470  | 0.541<br><i>P</i> =0.008  | 0.477<br><i>P</i> =0.021  | 0.628<br><i>P</i> =0.001  | 0.337<br><i>P</i> =0.125  |
| <b>Complex II</b>               | 0.042<br><i>P</i> =0.882  | 0.198<br><i>P</i> =0.479  | 0.543<br><i>P</i> =0.037  | 0.411<br><i>P</i> =0.128  | 0.101<br><i>P</i> =0.603  | 0.088<br><i>P</i> =0.658  | 0.009<br><i>P</i> =0.963  | 0.125<br><i>P</i> =0.526  | 0.623<br><i>P</i> =0.002  | 0.532<br><i>P</i> =0.009  | 0.640<br><i>P</i> =0.001  | 0.439<br><i>P</i> =0.041  |
| <b>Complex III</b>              | 0.148<br><i>P</i> =0.600  | 0.418<br><i>P</i> =0.121  | 0.693<br><i>P</i> =0.004  | 0.586<br><i>P</i> =0.022  | 0.188<br><i>P</i> =0.330  | 0.200<br><i>P</i> =0.307  | 0.118<br><i>P</i> =0.549  | 0.176<br><i>P</i> =0.369  | 0.530<br><i>P</i> =0.009  | 0.452<br><i>P</i> =0.030  | 0.554<br><i>P</i> =0.006  | 0.352<br><i>P</i> =0.108  |
| <b>Complex IV</b>               | 0.078<br><i>P</i> =0.781  | 0.0001<br><i>P</i> =1.000 | 0.160<br><i>P</i> =0.570  | 0.062<br><i>P</i> =0.827  | -0.147<br><i>P</i> =0.448 | 0.105<br><i>P</i> =0.596  | -0.207<br><i>P</i> =0.291 | 0.068<br><i>P</i> =0.730  | 0.557<br><i>P</i> =0.006  | 0.510<br><i>P</i> =0.013  | 0.660<br><i>P</i> =0.001  | 0.379<br><i>P</i> =0.082  |
| <b>Complex V</b>                | 0.178<br><i>P</i> =0.525  | 0.502<br><i>P</i> =0.057  | 0.735<br><i>P</i> =0.002  | 0.509<br><i>P</i> =0.053  | 0.126<br><i>P</i> =0.515  | 0.047<br><i>P</i> =0.813  | 0.068<br><i>P</i> =0.731  | 0.097<br><i>P</i> =0.624  | 0.597<br><i>P</i> =0.003  | 0.500<br><i>P</i> =0.015  | 0.590<br><i>P</i> =0.003  | 0.364<br><i>P</i> =0.096  |

---

For each variable pair, the Pearson's correlation coefficient and the corresponding  $P$  value are shown. 4MGS fast indicates 4-m gait speed at fast pace; 4MGS usual, 4-m gait speed at usual pace; 6MWT, 6-min walking test; ABI, ankle-brachial index; LC3B, microtubule-associated protein 1A/1B-light chain 3 non-lipidated (I), and lipidated (II) forms; NRF1, nuclear respiratory factor 1; PAD, peripheral artery disease; PGC-1 $\alpha$ , peroxisome proliferator-activated receptor gamma coactivator 1 alpha; PINK1, phosphatase and tensin homolog-induced kinase 1; SPPB, short physical performance battery; and TFAM, mitochondrial transcription factor A.
